# Supplementary material for: Zinc limitation triggers anticipatory adaptations in Mycobacterium tuberculosis
Source: PubMed Central journal article supplement (PMC8121289; doi:10.1371/journal.ppat.1009570), 2021-05-14
Supplement: ppat.1009570.s002.pdf [file ppat.1009570.s002.pdf]

*Mtb* H37Rv*Mtb* mc<sup>2</sup> 6206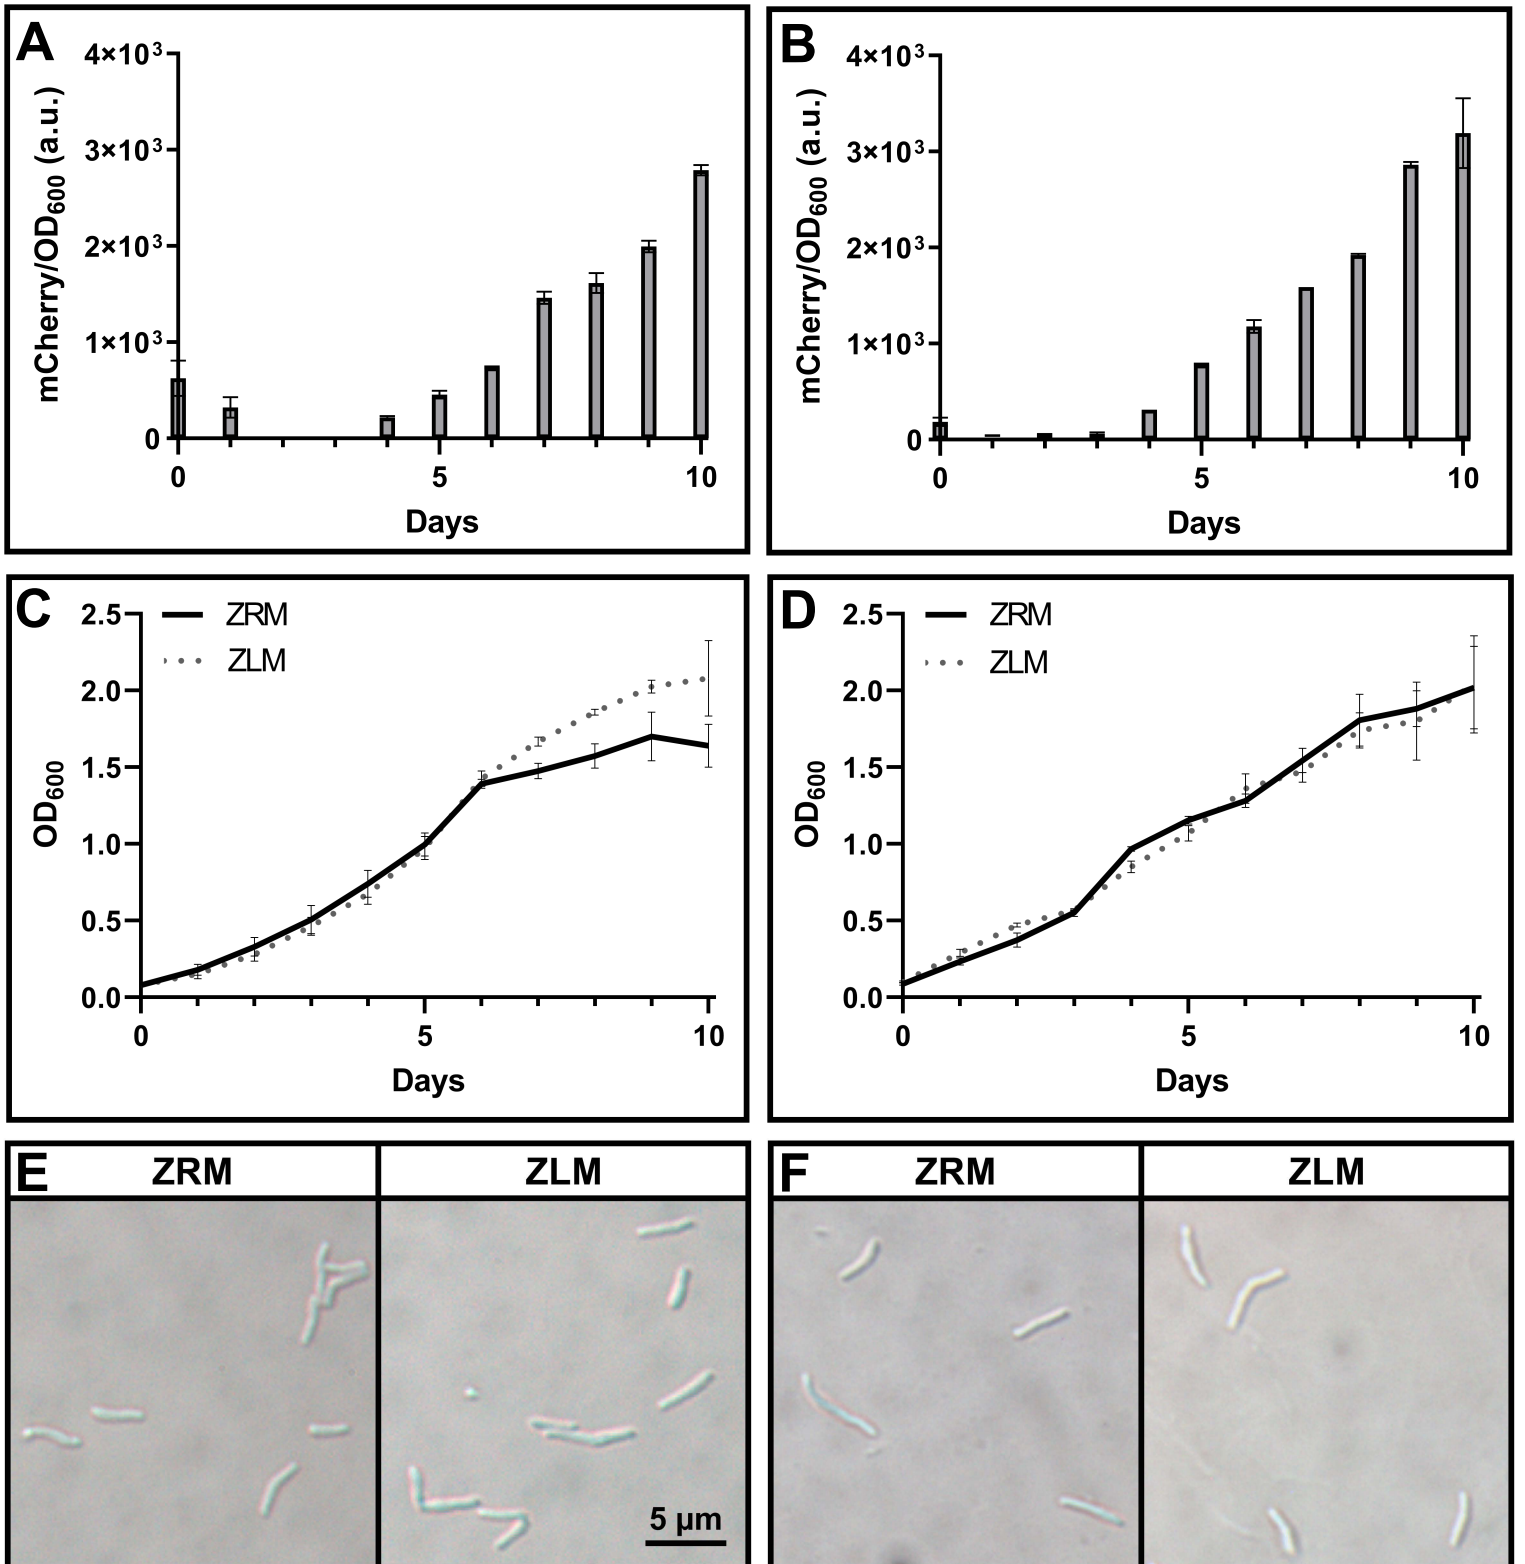

**S2 Fig. Growth and morphology of *Mtb* H37Rv and mc<sup>2</sup> 6206 in ZLM and ZRM.** Fluorescence from P<sub>allRP</sub>-mCherry reporter plasmid carried by *Mtb* H37Rv (A) and *Mtb* mc<sup>2</sup> 6206 (B) throughout growth in ZLM, normalized to OD<sub>600</sub> of the reporter strains at each time point. Fluorescence above background was not detected at any point during growth from *Mtb* H37Rv and mc<sup>2</sup> 6206 strains carrying P<sub>allRP</sub>-mCherry reporter plasmid when grown in ZRM. Optical density detected at 600nm (OD<sub>600</sub>) for *Mtb* H37Rv (C) and *Mtb* mc<sup>2</sup> 6206 (D) cultures grown in ZRM and ZLM. The increased variation in OD<sub>600</sub> measurements in late-log phase is due to increased clumping of cultures in both ZRM and ZLM. Data points for A-D represent the mean of cultures grown in biological triplicate and error bars represent the standard deviation. Differential interference contrast (DIC) microscopy of *Mtb* H37Rv (E) and *Mtb* mc<sup>2</sup> 6206 (F) cultures after 10 days of growth in ZRM or ZLM. *Mtb* H37Rv cultures were fixed in paraformaldehyde before being removed from the BSL3 facility for analysis, mc<sup>2</sup> 6206 cultures were not fixed. The scale bar in panel E corresponds to all micrographs. There was no significant difference in the length of cells from ZRM vs. ZLM for either H37Rv (t-test, p-value=0.48) or mc<sup>2</sup> 6206 (t-test, p-value=0.34). The average cell length and standard deviation in micrometers from 100 individual cells from cultures at day 10 are: H37Rv ZRM= 3.51 ±0.78, H37Rv ZLM= 3.51 ±0.91, mc<sup>2</sup> 6206 ZRM = 3.76 ±1.12, and mc<sup>2</sup> 6206 ZLM = 3.69 ±1.34. Cell length measurements were made following the methods described in the main text References [25].
