# Supplementary material for: Zinc limitation triggers anticipatory adaptations in Mycobacterium tuberculosis
Source: PubMed Central journal article supplement (PMC8121289; doi:10.1371/journal.ppat.1009570), 2021-05-14
Supplement: ppat.1009570.s011.pdf [file ppat.1009570.s011.pdf]

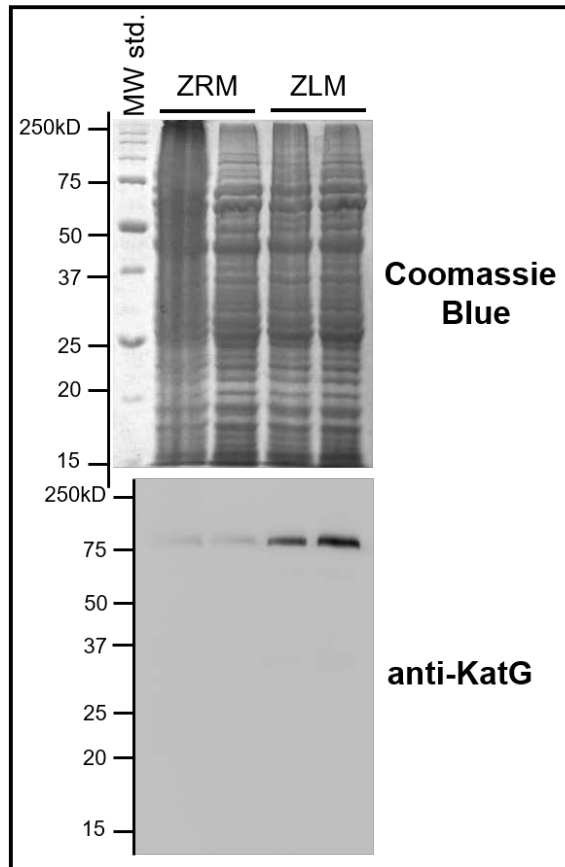

**S11 Fig. Detection of KatG protein in lysates from *Mtb mc<sup>2</sup> 6206* in ZRM and ZLM.** Proteins from day 10 cultures from two independent growths in ZRM and ZLM were extracted using TRIzol™ and 10 µg protein per sample were resolved on a 5%/12% sodium dodecyl sulfate polyacrylamide gel. Two identical gels were resolved, one gel was stained with Coomassie Blue as a control for protein loading amount and the other was used for blotting.
